# Supplementary material
Source: publisher figshare collection journal article supplement (https://acs.figshare.com/ndownloader/files/4298530)
Supplement: Supplementary file 1 [file 4298530]

data_global
_publ_requested_journal          'Journal of Organic Chemistry'
_publ_contact_author_name        'Stephen G. Davies'
_publ_contact_author_address     
;Department of Chemistry
Chemistry Research Laboratory
University of Oxford
Mansfield Road
Oxford
OX1 3TA
U.K.
;
_publ_contact_author_email       steve.davies@chem.ox.ac.uk

_publ_contact_author_phone       '+44 1865 275695'
_publ_contact_author_fax         '+44 1865 275633'
loop_
_publ_author_name
_publ_author_address
'Cresswell, Alexander J'
;Department of Chemistry
Chemistry Research Laboratory
University of Oxford
Mansfield Road
Oxford
OX1 3TA
U.K.
;
'Davies, Stephen G.'
;Department of Chemistry
Chemistry Research Laboratory
University of Oxford
Mansfield Road
Oxford
OX1 3TA
U.K.
;
'Lee, James A.'
;Department of Chemistry
Chemistry Research Laboratory
University of Oxford
Mansfield Road
Oxford
OX1 3TA
U.K.
;
'Roberts, Paul M.'
;Department of Chemistry
Chemistry Research Laboratory
University of Oxford
Mansfield Road
Oxford
OX1 3TA
U.K.
;
'Thomson, James E.'
;Department of Chemistry
Chemistry Research Laboratory
University of Oxford
Mansfield Road
Oxford
OX1 3TA
U.K.
;
'Tyte, Melloney J.'
;Department of Chemistry
Chemistry Research Laboratory
University of Oxford
Mansfield Road
Oxford
OX1 3TA
U.K.
;
_audit_creation_date             11-01-26
_audit_creation_method           CRYSTALS_ver_14.06

_oxford_structure_analysis_title 'SGD337 in C2'
_chemical_name_systematic        ?
_chemical_melting_point          ?

#looking for refcif 


# Check this file using the IUCr facility at: 
# http://checkcif.iucr.org/ 

# The content below is held in the file 'script/refcif.dat'. This is a text 
# file which you may edit to reflect local conditions. 
# Items which need looking at are represented by a '?'. 
# Items for which there are choices are prefixed with 'choose from'. 

_publ_contact_letter             
; 
 
;
_publ_requested_category         EO # choose from: FI FM FO CI CM CO AD 
_publ_requested_coeditor_name    'Dr J E Thomson'

_publ_section_title              
# Title of paper - generally just the systematic or trivial name 
; 
 Ring Opening Hydrofluorination of Epoxides by HBF4:
 Application to the Asymmetric Synthesis of 3-Deoxy-3-fluorosafingol
;
loop_
_publ_author_footnote
; 
 ? # Footnote for author 1 
;
; 
 ? # Footnote 2 
;


_publ_section_abstract           
# Text of the abstract 
# (a) The Abstract must be self-contained and comprehensible 
# without the rest of the paper. This means no references 
# to atom names or to compound numbers; compounds must be 
# identified as the title compound, or by name or by some other 
# means such as derivatives of each other (e.g. "the 
# corresponding ketone"). 
# (b) The chemical formula of "the title compound" must be given. 
# (c) Any crystallographic molecular symmetry should be 
# mentioned, and also the presence of more than one molecule 
# in the asymmetric unit (i.e. anything other than Z'=1). 
; 
? 
;

_publ_section_related_literature 
# Not in version 2.3.1 
############################################################### 
# Essential references (e.g. to the origin of the material studied, related 
# structural studies, and to information supporting the reported structure) 
# should be cited in this section, with appropriate very brief explanatory 
# text, for example `The synthesis of the complex is described by Jones 
# (2001). The anhydrous complex has essentially the same coordination 
# geometry (Smith, 2003).' In addition, all references included in the 
# supplementary materials, but not elsewhere in the published article, 
# should be given here. The simple text `For related literature, see:...' 
# may be used, but further details should be provided in the Comment 
# section, which forms part of the supplementary material. 
############################################################### 
; 
? 
;

_publ_section_comment            
# Text of the paper 
# Note that atoms are referenced as N2, not N(2) or N~2~ 
# If text containing () occur within (), the outer ones should be [] 
# Figures should be referenced as Fig. 
; 
? 
;
_publ_section_acknowledgements   # Acknowledgments 
; 
? 
;
_publ_section_figure_captions    
# Captions to figures - Start each caption on a new line after a blank line 
; 
Fig. 1. 
The title compound with displacement ellipsoids drawn at the 50% 
probability level. H atoms are shown as spheres of 
arbitary radius. 
 
;


_publ_section_exptl_refinement   
# Some potentially useful phrases are donated by Bill Clegg: 
; 
In the absence of significant anomalous scattering, Friedel pairs were 
merged. 
 
The absolute configuration was arbitrarily assigned. 
 
The relatively large ratio of minimum to maximum corrections applied 
in the multiscan process (1:nnn) reflect changes in the illuminated 
volume of the crystal. 
 
Changes in illuminated volume were kept to a minimum, and were 
taken into account (G\"orbitz, 1999) by the multi-scan inter-frame 
scaling (DENZO/SCALEPACK, Otwinowski & Minor, 1997). 
 
 
G\"orbitz, C. H. (1999). Acta Cryst. B55, 1090-1098. 
 
 
 
 
The H atoms were all located in a difference map, but those 
attached to carbon atoms were repositioned geometrically. 
The H atoms were initially refined with soft restraints on the 
bond lengths and angles to regularise their geometry 
(C---H in the range 0.93--0.98, 
N---H in the range 0.86--0.89 
N---H to 0.86 
O---H = 0.82 
\%A) 
and 
U~iso~(H) (in the range 1.2-1.5 times U~eq~ of the parent atom), 
after which the positions were refined with riding constraints. 
 
;

_publ_section_exptl_prep         
# Brief details or a reference. Include solvent if known 
; 
? 
;
_symmetry_cell_setting           ?
_symmetry_space_group_name_h-m   ?
_symmetry_int_tables_number      ?
_chemical_absolute_configuration ?
_diffrn_radiation_probe          ?

# Hand-made tables can be put in the cif. The number of columns 
# is set in the loop header. 
# The contants of each column can either be a piece of text 
# without any spaces (eg a number) or other text enclosed in " " 
# Remove the leading # in the following example 
 
#geom_extra_table_head_A 
#; 
#Table 2. 
#Molecular parameters deviating most from MOGUL averages 
#; 
# 
#loop_ 
#_geom_extra_tableA_col_1 
#_geom_extra_tableA_col_2 
#_geom_extra_tableA_col_3 
#_geom_extra_tableA_col_4 
# 
#Parameter "Observed Value" "MOGUL Value" "MOGUL e.s.d" 
#N5-C6-C4 129 124 "7 (\%)" 
#C3-O10-C2 105 109 "2 (\%)" 
#C6-O7 1.25 1.22 ".02 (\%A)" 
# 
 
data_1 
 
_exptl_special_details 
; 
 The crystal was 
placed in the cold stream of an Oxford 
Cryosystems open-flow nitrogen cryostat (Cosier & 
Glazer, 1986) with a nominal stability of 0.1K. 
 
Cosier, J. & Glazer, A.M., 1986. J. Appl. Cryst. 105 107. 
; 
_refine_special_details 
; 
? 
; 
# End of 'script/refcif.dat' 
#end of refcif 
_cell_length_a                    5.73792(11)
_cell_length_b                    7.6761(2)
_cell_length_c                    42.7479(9)
_cell_angle_alpha                 90
_cell_angle_beta                  90.9711(18)
_cell_angle_gamma                 90
_cell_volume                      1882.56(7)
 
_symmetry_cell_setting            'Monoclinic' 
_symmetry_space_group_name_H-M    'C 1 2 1 ' 
_symmetry_space_group_name_Hall   ? 
loop_
 _symmetry_equiv_pos_as_xyz
 'x,y,z'
 'x+1/2,y+1/2,z'
 '-x,y,-z'
 '-x+1/2,y+1/2,-z'

loop_
_atom_type_symbol
_atom_type_scat_dispersion_real
_atom_type_scat_dispersion_imag
_atom_type_scat_Cromer_Mann_a1
_atom_type_scat_Cromer_Mann_b1
_atom_type_scat_Cromer_Mann_a2
_atom_type_scat_Cromer_Mann_b2
_atom_type_scat_Cromer_Mann_a3
_atom_type_scat_Cromer_Mann_b3
_atom_type_scat_Cromer_Mann_a4
_atom_type_scat_Cromer_Mann_b4
_atom_type_scat_Cromer_Mann_c
_atom_type_scat_source  
 C       0.0181   0.0091   2.3100  20.8439   1.0200  10.2075   1.5886   0.5687
   0.8650  51.6512   0.2156 'International Tables Vol C 4.2.6.8 and 6.1.1.4'
 H       0.0000   0.0000   0.4930  10.5109   0.3229  26.1257   0.1402   3.1424
   0.0408  57.7998   0.0030 'International Tables Vol C 4.2.6.8 and 6.1.1.4'
 N       0.0311   0.0180  12.2126   0.0057   3.1322   9.8933   2.0125  28.9975
   1.1663   0.5826 -11.5290 'International Tables Vol C 4.2.6.8 and 6.1.1.4'
 O       0.0492   0.0322   3.0485  13.2771   2.2868   5.7011   1.5463   0.3239
   0.8670  32.9089   0.2508 'International Tables Vol C 4.2.6.8 and 6.1.1.4'
 F       0.0727   0.0534   3.5392  10.2825   2.6412   4.2944   1.5170   0.2615
   1.0243  26.1476   0.2776 'International Tables Vol C 4.2.6.8 and 6.1.1.4'
 
 
_cell_formula_units_Z                    4

# Given Formula = C18 H38 F1 N1 O1 
# Dc =      1.07 Fooo =    680.00 Mu =      5.56 M =    303.50
# Found Formula = C18 H38 F1 N1 O1 
# Dc =      1.07 FOOO =    680.00 Mu =      5.56 M =    303.50

_chemical_formula_sum             'C18 H38 F1 N1 O1'
_chemical_formula_moiety          'C18 H38 F1 N1 O1'
_chemical_compound_source                ?
_chemical_formula_weight            303.50
 
 
_cell_measurement_reflns_used            0
_cell_measurement_theta_min              0
_cell_measurement_theta_max              0
_cell_measurement_temperature          150
 
_exptl_crystal_description        'plate' 
_exptl_crystal_colour             'colourless' 
_exptl_crystal_size_min           0.040 
_exptl_crystal_size_mid           0.160 
_exptl_crystal_size_max           0.290 
 
_exptl_crystal_density_diffrn     1.071 
_exptl_crystal_density_meas       ? 
_exptl_crystal_density_method     'not measured' 
# Non-dispersive F(000): 
_exptl_crystal_F_000              680 
_exptl_absorpt_coefficient_mu     0.556 
 
# Sheldrick geometric approximatio 0.91 0.98 
_exptl_absorpt_correction_type    none 
_exptl_absorpt_correction_T_min   0.9148 
_exptl_absorpt_correction_T_max   0.9780 
_diffrn_measurement_device_type   'Unknown' 
_diffrn_measurement_device        'Serial' 
_diffrn_radiation_monochromator   'graphite' 
_diffrn_radiation_type            'Cu K\a'
_diffrn_radiation_wavelength           1.54184
_diffrn_measurement_method        \w/2\q 
 
# If a reference occurs more than once, delete the author 
# and date from subsequent references. 
_computing_data_collection        'USER DEFINED DATA COLLECTION' 
_computing_cell_refinement        'USER DEFINED CELL REFINEMENT' 
_computing_data_reduction         'USER DEFINED DATA REDUCTION' 
_computing_structure_solution     'SIR92 (Altomare et al., 1994)' 
_computing_structure_refinement   'CRYSTALS (Betteridge et al., 2003)' 
_computing_publication_material   'CRYSTALS (Betteridge et al., 2003)' 
_computing_molecular_graphics     'CAMERON (Watkin et al., 1996)' 
 
_diffrn_standards_interval_time   . 
_diffrn_standards_interval_count  . 
_diffrn_standards_number          0 
_diffrn_standards_decay_%         ? 
 
_diffrn_ambient_temperature        150
_diffrn_reflns_number             3777 
_reflns_number_total              3777 
_diffrn_reflns_av_R_equivalents   0.058 
# Number of reflections without Friedels Law is 3777 
# Number of reflections with Friedels Law is 2114 
# Theoretical number of reflections is about 1990 
 
 
_diffrn_reflns_theta_min          3.102 
_diffrn_reflns_theta_max          76.984 
_diffrn_measured_fraction_theta_max 0.993 
 
_diffrn_reflns_theta_full         75.445 
_diffrn_measured_fraction_theta_full 0.999 
 
 
_diffrn_reflns_limit_h_min        -7 
_diffrn_reflns_limit_h_max        7 
_diffrn_reflns_limit_k_min        -9 
_diffrn_reflns_limit_k_max        8 
_diffrn_reflns_limit_l_min        0 
_diffrn_reflns_limit_l_max        53 
_reflns_limit_h_min               -7 
_reflns_limit_h_max               7 
_reflns_limit_k_min               -9 
_reflns_limit_k_max               8 
_reflns_limit_l_min               0 
_reflns_limit_l_max               53 
 
_oxford_diffrn_Wilson_B_factor    2.44 
_oxford_diffrn_Wilson_scale       0.03 
 
_atom_sites_solution_primary      direct #heavy,direct,difmap,geom
# _atom_sites_solution_secondary  difmap
_atom_sites_solution_hydrogens    geom
 
_refine_diff_density_min          -0.37 
_refine_diff_density_max          0.53 
 
 
# The current dictionary definitions do not cover the 
# situation where the reflections used for refinement were 
# selected by a user-defined sigma threshold 
 
 
# The values actually used during refinement 
_oxford_reflns_threshold_expression_ref     I>3.0\s(I)
_refine_ls_number_reflns          3581 
_refine_ls_number_restraints      1 
_refine_ls_number_parameters      191 
_oxford_refine_ls_R_factor_ref    0.0723 
_refine_ls_wR_factor_ref          0.0788 
_refine_ls_goodness_of_fit_ref    0.9582 
_refine_ls_shift/su_max           0.0004953 
_refine_ls_shift/su_mean          0.0000534 
 
 
# The values computed from all data 
_oxford_reflns_number_all         3743 
_refine_ls_R_factor_all           0.0736 
_refine_ls_wR_factor_all          0.0805 
 
# The values computed with a 2 sigma cutoff - a la SHELX 
_reflns_threshold_expression      I>2.0\s(I)
_reflns_number_gt                 3646 
_refine_ls_R_factor_gt            0.0728 
_refine_ls_wR_factor_gt           0.0792 
 
_refine_ls_abs_structure_Flack    0.3(2) 
_refine_ls_abs_structure_details  'Flack (1983), 0 Friedel-pairs' 
# choose from: rm (reference molecule of known chirality), 
# ad (anomolous dispersion - Flack), rmad (rm and ad), 
# syn (from synthesis), unk (unknown) or . (not applicable). 
_chemical_absolute_configuration  'ad' 
 
 
_refine_ls_structure_factor_coef  F 
_refine_ls_matrix_type            full
_refine_ls_hydrogen_treatment     none           # none, undef, noref, refall,
                                                 # refxyz, refU, constr or mixed
_refine_ls_weighting_scheme       calc 
_refine_ls_weighting_details 
;
 Method, part 1, Chebychev polynomial, (Watkin, 1994, Prince, 1982) 
 [weight] = 1.0/[A~0~*T~0~(x)+A~1~*T~1~(x) ... +A~n-1~]*T~n-1~(x)] 
 where A~i~ are the Chebychev coefficients listed below and x= Fcalc/Fmax 
 Method = Robust Weighting (Prince, 1982) 
 W = [weight] * [1-(deltaF/6*sigmaF)^2^]^2^ 
 A~i~ are: 
 11.2 3.46 6.59 
;
# Insert your own references if required - in alphabetical order 
_publ_section_references 
; 
User-defined data collection reference 
 
User defined data reduction 
 
User defined cell refinement 
 
Altomare, A., Cascarano, G., Giacovazzo, C., Guagliardi, A., Burla, M.C., 
Polidori, G. & Camalli, M. (1994). J. Appl. Cryst. 27, 435. 
 
Betteridge, P.W., Carruthers, J.R., Cooper, R.I., 
Prout, K. & Watkin, D.J. (2003). J. Appl. Cryst. 36, 1487. 
 
Flack, H. D. (1983). Acta Cryst. A39, 876-881. 
 
Prince, E. 
Mathematical Techniques in Crystallography 
and Materials Science 
Springer-Verlag, New York, 1982. 
 
Watkin D.J. (1994). 
Acta Cryst, A50, 411-437. 
 
Watkin, D.J., Prout, C.K. & Pearce, L.J. (1996). CAMERON, Chemical 
Crystallography Laboratory, Oxford, UK. 
; 

# Uequiv = arithmetic mean of Ui i.e. Ueqiv = (U1+U2+U3)/3

# Replace last . with number of unfound hydrogen atomsattached to an atom.

# ..._refinement_flags_... 
# . no refinement constraints           S special position constraint on site
# G rigid group refinement of site      R riding atom
# D distance or angle restraint on site T thermal displacement constraints
# U Uiso or Uij restraint (rigid bond)  P partial occupancy constraint


loop_
_atom_site_label
_atom_site_type_symbol
_atom_site_fract_x
_atom_site_fract_y
_atom_site_fract_z
_atom_site_U_iso_or_equiv
_atom_site_occupancy
_atom_site_adp_type
_atom_site_refinement_flags_posn
_atom_site_refinement_flags_adp
_atom_site_refinement_flags_occupancy
_atom_site_disorder_assembly
_atom_site_disorder_group
_oxford_atom_site_special_shape
_atom_site_attached_hydrogens
F1 F 0.1022(2) 0.7928(2) 0.90419(3) 0.0354 1.0000 Uani . . . . . . . 
C2 C 0.3394(4) 0.7694(3) 0.91285(5) 0.0230 1.0000 Uani . . . . . . . 
C3 C 0.3920(3) 0.8854(3) 0.94128(5) 0.0212 1.0000 Uani . . . . . . . 
N4 N 0.2204(3) 0.8668(3) 0.96619(4) 0.0238 1.0000 Uani . . . . . . . 
C5 C 0.6330(4) 0.8431(3) 0.95530(5) 0.0247 1.0000 Uani . . . . . . . 
O6 O 0.7147(3) 0.9827(2) 0.97414(4) 0.0259 1.0000 Uani . . . . . . . 
C7 C 0.4840(4) 0.8121(3) 0.88450(5) 0.0282 1.0000 Uani . . . . . . . 
C8 C 0.4503(4) 0.6843(3) 0.85727(5) 0.0284 1.0000 Uani . . . . . . . 
C9 C 0.6235(4) 0.7203(3) 0.83125(5) 0.0286 1.0000 Uani . . . . . . . 
C10 C 0.6163(4) 0.5845(3) 0.80497(5) 0.0287 1.0000 Uani . . . . . . . 
C11 C 0.7998(5) 0.6203(3) 0.78021(5) 0.0285 1.0000 Uani . . . . . . . 
C12 C 0.8029(4) 0.4827(3) 0.75441(5) 0.0288 1.0000 Uani . . . . . . . 
C13 C 0.9901(4) 0.5182(3) 0.73018(6) 0.0295 1.0000 Uani . . . . . . . 
C14 C 0.9972(4) 0.3809(3) 0.70439(5) 0.0293 1.0000 Uani . . . . . . . 
C15 C 1.1858(5) 0.4160(3) 0.68040(6) 0.0305 1.0000 Uani . . . . . . . 
C16 C 1.1951(4) 0.2797(3) 0.65457(5) 0.0319 1.0000 Uani . . . . . . . 
C17 C 1.3817(5) 0.3156(3) 0.63054(6) 0.0332 1.0000 Uani . . . . . . . 
C18 C 1.3894(5) 0.1799(4) 0.60458(6) 0.0348 1.0000 Uani . . . . . . . 
C19 C 1.5756(5) 0.2154(4) 0.58049(6) 0.0383 1.0000 Uani . . . . . . . 
C20 C 1.5809(6) 0.0817(5) 0.55442(6) 0.0479 1.0000 Uani . . . . . . . 
C21 C 1.7663(7) 0.1178(5) 0.53018(7) 0.0576 1.0000 Uani . . . . . . . 
H21 H 0.3625 0.6467 0.9188 0.0274 1.0000 Uiso R . . . . . . 
H31 H 0.3863 1.0090 0.9346 0.0259 1.0000 Uiso R . . . . . . 
H52 H 0.7408 0.8229 0.9382 0.0308 1.0000 Uiso R . . . . . . 
H51 H 0.6195 0.7350 0.9668 0.0317 1.0000 Uiso R . . . . . . 
H71 H 0.4454 0.9293 0.8775 0.0342 1.0000 Uiso R . . . . . . 
H72 H 0.6466 0.8137 0.8905 0.0341 1.0000 Uiso R . . . . . . 
H81 H 0.2919 0.6955 0.8488 0.0344 1.0000 Uiso R . . . . . . 
H82 H 0.4716 0.5678 0.8653 0.0364 1.0000 Uiso R . . . . . . 
H91 H 0.5941 0.8308 0.8224 0.0350 1.0000 Uiso R . . . . . . 
H92 H 0.7788 0.7223 0.8403 0.0347 1.0000 Uiso R . . . . . . 
H101 H 0.4600 0.5889 0.7955 0.0362 1.0000 Uiso R . . . . . . 
H102 H 0.6434 0.4707 0.8139 0.0358 1.0000 Uiso R . . . . . . 
H111 H 0.7681 0.7340 0.7710 0.0356 1.0000 Uiso R . . . . . . 
H112 H 0.9499 0.6237 0.7906 0.0352 1.0000 Uiso R . . . . . . 
H121 H 0.6465 0.4790 0.7443 0.0344 1.0000 Uiso R . . . . . . 
H122 H 0.8390 0.3686 0.7641 0.0349 1.0000 Uiso R . . . . . . 
H131 H 0.9648 0.6340 0.7212 0.0368 1.0000 Uiso R . . . . . . 
H132 H 1.1414 0.5178 0.7409 0.0354 1.0000 Uiso R . . . . . . 
H141 H 0.8442 0.3779 0.6940 0.0357 1.0000 Uiso R . . . . . . 
H142 H 1.0271 0.2686 0.7137 0.0352 1.0000 Uiso R . . . . . . 
H151 H 1.1535 0.5296 0.6710 0.0367 1.0000 Uiso R . . . . . . 
H152 H 1.3331 0.4214 0.6912 0.0361 1.0000 Uiso R . . . . . . 
H161 H 1.0416 0.2771 0.6443 0.0380 1.0000 Uiso R . . . . . . 
H162 H 1.2204 0.1665 0.6643 0.0384 1.0000 Uiso R . . . . . . 
H171 H 1.3530 0.4311 0.6214 0.0396 1.0000 Uiso R . . . . . . 
H172 H 1.5313 0.3173 0.6410 0.0391 1.0000 Uiso R . . . . . . 
H182 H 1.2376 0.1754 0.5942 0.0411 1.0000 Uiso R . . . . . . 
H181 H 1.4174 0.0663 0.6136 0.0412 1.0000 Uiso R . . . . . . 
H191 H 1.5436 0.3296 0.5712 0.0463 1.0000 Uiso R . . . . . . 
H192 H 1.7255 0.2160 0.5911 0.0457 1.0000 Uiso R . . . . . . 
H201 H 1.4278 0.0824 0.5443 0.0580 1.0000 Uiso R . . . . . . 
H202 H 1.6110 -0.0314 0.5639 0.0576 1.0000 Uiso R . . . . . . 
H213 H 1.7582 0.0310 0.5137 0.0866 1.0000 Uiso R . . . . . . 
H212 H 1.7362 0.2301 0.5206 0.0867 1.0000 Uiso R . . . . . . 
H211 H 1.9184 0.1155 0.5400 0.0863 1.0000 Uiso R . . . . . . 
H61 H 0.7178 0.9682 0.9933 0.0364 1.0000 Uiso R . . . . . . 
H41 H 0.0797 0.9046 0.9616 0.0292 1.0000 Uiso R . . . . . . 
H42 H 0.1809 0.7565 0.9710 0.0316 1.0000 Uiso R . . . . . . 
loop_
_atom_site_aniso_label
_atom_site_aniso_U_11
_atom_site_aniso_U_22
_atom_site_aniso_U_33
_atom_site_aniso_U_23
_atom_site_aniso_U_13
_atom_site_aniso_U_12
F1 0.0183(6) 0.0467(9) 0.0412(7) -0.0048(6) 0.0000(5) -0.0018(6) 
C2 0.0137(8) 0.0188(11) 0.0366(10) -0.0007(8) 0.0030(7) -0.0056(8) 
C3 0.0121(9) 0.0172(11) 0.0344(10) -0.0002(8) 0.0038(7) -0.0033(8) 
N4 0.0132(8) 0.0219(10) 0.0364(9) -0.0006(7) 0.0053(6) -0.0022(7) 
C5 0.0178(9) 0.0164(11) 0.0399(11) -0.0027(8) 0.0024(8) -0.0045(8) 
O6 0.0222(7) 0.0207(8) 0.0348(8) -0.0002(6) 0.0009(6) -0.0084(6) 
C7 0.0217(10) 0.0266(13) 0.0365(11) -0.0017(9) 0.0076(8) -0.0131(9) 
C8 0.0283(11) 0.0239(13) 0.0332(11) -0.0010(9) 0.0063(9) -0.0052(10) 
C9 0.0285(12) 0.0227(13) 0.0348(11) -0.0011(9) 0.0075(9) -0.0050(9) 
C10 0.0275(12) 0.0233(13) 0.0356(11) -0.0014(9) 0.0065(8) -0.0009(10) 
C11 0.0283(12) 0.0214(12) 0.0360(12) -0.0016(9) 0.0069(9) -0.0023(9) 
C12 0.0263(11) 0.0253(13) 0.0349(11) -0.0028(10) 0.0048(8) 0.0000(10) 
C13 0.0287(11) 0.0238(13) 0.0362(11) -0.0021(9) 0.0064(9) -0.0015(10) 
C14 0.0272(11) 0.0241(13) 0.0366(11) -0.0027(10) 0.0044(8) -0.0005(10) 
C15 0.0302(12) 0.0255(13) 0.0359(12) -0.0016(9) 0.0045(9) -0.0015(10) 
C16 0.0308(11) 0.0305(14) 0.0346(11) -0.0018(10) 0.0052(9) -0.0016(11) 
C17 0.0347(12) 0.0309(14) 0.0342(11) -0.0026(10) 0.0063(9) -0.0010(11) 
C18 0.0376(14) 0.0335(14) 0.0336(12) -0.0027(10) 0.0050(10) -0.0011(12) 
C19 0.0409(14) 0.0396(16) 0.0348(12) 0.0000(10) 0.0089(10) 0.0021(12) 
C20 0.0543(19) 0.055(2) 0.0350(13) -0.0067(13) 0.0096(12) 0.0020(15) 
C21 0.063(2) 0.070(3) 0.0400(15) -0.0067(15) 0.0175(14) 0.0044(17) 

_refine_ls_extinction_method 
    'None'
_oxford_refine_ls_scale 5.790(15) 
loop_
 _geom_bond_atom_site_label_1
 _geom_bond_site_symmetry_1
 _geom_bond_atom_site_label_2
 _geom_bond_site_symmetry_2
 _geom_bond_distance
 _geom_bond_publ_flag
F1 . C2 . 1.416(2)    yes
C2 . C3 . 1.532(3)    yes
C2 . C7 . 1.516(3)    yes
C2 . H21 . 0.984    no
C3 . N4 . 1.469(2)    yes
C3 . C5 . 1.532(3)    yes
C3 . H31 . 0.991    no
N4 . H41 . 0.877    no
N4 . H42 . 0.901    no
C5 . O6 . 1.416(3)    yes
C5 . H52 . 0.978    no
C5 . H51 . 0.968    no
O6 . H61 . 0.827    no
C7 . C8 . 1.532(3)    yes
C7 . H71 . 0.973    no
C7 . H72 . 0.964    no
C8 . C9 . 1.529(3)    yes
C8 . H81 . 0.977    no
C8 . H82 . 0.964    no
C9 . C10 . 1.533(3)    yes
C9 . H91 . 0.944    no
C9 . H92 . 0.965    no
C10 . C11 . 1.531(3)    yes
C10 . H101 . 0.979    no
C10 . H102 . 0.965    no
C11 . C12 . 1.528(3)    yes
C11 . H111 . 0.974    no
C11 . H112 . 0.963    no
C12 . C13 . 1.530(3)    yes
C12 . H121 . 0.990    no
C12 . H122 . 0.988    no
C13 . C14 . 1.526(3)    yes
C13 . H131 . 0.977    no
C13 . H132 . 0.974    no
C14 . C15 . 1.528(3)    yes
C14 . H141 . 0.978    no
C14 . H142 . 0.964    no
C15 . C16 . 1.523(3)    yes
C15 . H151 . 0.975    no
C15 . H152 . 0.956    no
C16 . C17 . 1.522(3)    yes
C16 . H161 . 0.978    no
C16 . H162 . 0.973    no
C17 . C18 . 1.523(3)    yes
C17 . H171 . 0.982    no
C17 . H172 . 0.962    no
C18 . C19 . 1.521(3)    yes
C18 . H182 . 0.971    no
C18 . H181 . 0.966    no
C19 . C20 . 1.516(4)    yes
C19 . H191 . 0.979    no
C19 . H192 . 0.965    no
C20 . C21 . 1.523(4)    yes
C20 . H201 . 0.974    no
C20 . H202 . 0.972    no
C21 . H213 . 0.971    no
C21 . H212 . 0.968    no
C21 . H211 . 0.962    no
loop_
 _geom_angle_atom_site_label_1
 _geom_angle_site_symmetry_1
 _geom_angle_atom_site_label_2
 _geom_angle_site_symmetry_2
 _geom_angle_atom_site_label_3
 _geom_angle_site_symmetry_3
 _geom_angle
 _geom_angle_publ_flag
F1 . C2 . C3 . 108.03(17)    yes
F1 . C2 . C7 . 107.45(17)    yes
C3 . C2 . C7 . 113.91(17)    yes
F1 . C2 . H21 . 108.3    no
C3 . C2 . H21 . 109.1    no
C7 . C2 . H21 . 109.9    no
C2 . C3 . N4 . 113.11(16)    yes
C2 . C3 . C5 . 110.57(17)    yes
N4 . C3 . C5 . 107.92(17)    yes
C2 . C3 . H31 . 108.8    no
N4 . C3 . H31 . 106.4    no
C5 . C3 . H31 . 109.9    no
C3 . N4 . H41 . 115.6    no
C3 . N4 . H42 . 115.5    no
H41 . N4 . H42 . 97.4    no
C3 . C5 . O6 . 110.48(18)    yes
C3 . C5 . H52 . 108.6    no
O6 . C5 . H52 . 109.8    no
C3 . C5 . H51 . 107.5    no
O6 . C5 . H51 . 112.8    no
H52 . C5 . H51 . 107.5    no
C5 . O6 . H61 . 117.6    no
C2 . C7 . C8 . 113.91(18)    yes
C2 . C7 . H71 . 108.8    no
C8 . C7 . H71 . 109.4    no
C2 . C7 . H72 . 109.3    no
C8 . C7 . H72 . 108.7    no
H71 . C7 . H72 . 106.6    no
C7 . C8 . C9 . 111.20(19)    yes
C7 . C8 . H81 . 109.3    no
C9 . C8 . H81 . 109.0    no
C7 . C8 . H82 . 108.2    no
C9 . C8 . H82 . 110.2    no
H81 . C8 . H82 . 108.9    no
C8 . C9 . C10 . 113.61(19)    yes
C8 . C9 . H91 . 110.0    no
C10 . C9 . H91 . 108.3    no
C8 . C9 . H92 . 108.6    no
C10 . C9 . H92 . 108.5    no
H91 . C9 . H92 . 107.7    no
C9 . C10 . C11 . 111.99(19)    yes
C9 . C10 . H101 . 107.1    no
C11 . C10 . H101 . 110.1    no
C9 . C10 . H102 . 108.9    no
C11 . C10 . H102 . 109.1    no
H101 . C10 . H102 . 109.7    no
C10 . C11 . C12 . 113.06(19)    yes
C10 . C11 . H111 . 108.4    no
C12 . C11 . H111 . 109.3    no
C10 . C11 . H112 . 107.8    no
C12 . C11 . H112 . 109.3    no
H111 . C11 . H112 . 108.8    no
C11 . C12 . C13 . 112.49(19)    yes
C11 . C12 . H121 . 108.2    no
C13 . C12 . H121 . 110.6    no
C11 . C12 . H122 . 108.4    no
C13 . C12 . H122 . 107.3    no
H121 . C12 . H122 . 109.8    no
C12 . C13 . C14 . 113.15(19)    yes
C12 . C13 . H131 . 109.0    no
C14 . C13 . H131 . 110.6    no
C12 . C13 . H132 . 108.2    no
C14 . C13 . H132 . 107.5    no
H131 . C13 . H132 . 108.2    no
C13 . C14 . C15 . 112.98(19)    yes
C13 . C14 . H141 . 108.1    no
C15 . C14 . H141 . 109.8    no
C13 . C14 . H142 . 109.0    no
C15 . C14 . H142 . 108.2    no
H141 . C14 . H142 . 108.7    no
C14 . C15 . C16 . 113.52(19)    yes
C14 . C15 . H151 . 107.5    no
C16 . C15 . H151 . 109.0    no
C14 . C15 . H152 . 108.4    no
C16 . C15 . H152 . 109.7    no
H151 . C15 . H152 . 108.6    no
C15 . C16 . C17 . 113.5(2)    yes
C15 . C16 . H161 . 107.3    no
C17 . C16 . H161 . 109.8    no
C15 . C16 . H162 . 108.1    no
C17 . C16 . H162 . 110.4    no
H161 . C16 . H162 . 107.5    no
C16 . C17 . C18 . 113.4(2)    yes
C16 . C17 . H171 . 108.5    no
C18 . C17 . H171 . 109.5    no
C16 . C17 . H172 . 108.7    no
C18 . C17 . H172 . 108.2    no
H171 . C17 . H172 . 108.4    no
C17 . C18 . C19 . 113.6(2)    yes
C17 . C18 . H182 . 108.7    no
C19 . C18 . H182 . 109.4    no
C17 . C18 . H181 . 109.6    no
C19 . C18 . H181 . 108.5    no
H182 . C18 . H181 . 106.9    no
C18 . C19 . C20 . 113.6(2)    yes
C18 . C19 . H191 . 107.9    no
C20 . C19 . H191 . 108.3    no
C18 . C19 . H192 . 108.3    no
C20 . C19 . H192 . 108.6    no
H191 . C19 . H192 . 110.2    no
C19 . C20 . C21 . 113.6(3)    yes
C19 . C20 . H201 . 107.2    no
C21 . C20 . H201 . 109.3    no
C19 . C20 . H202 . 107.8    no
C21 . C20 . H202 . 108.9    no
H201 . C20 . H202 . 110.1    no
C20 . C21 . H213 . 110.1    no
C20 . C21 . H212 . 109.1    no
H213 . C21 . H212 . 107.4    no
C20 . C21 . H211 . 109.8    no
H213 . C21 . H211 . 109.7    no
H212 . C21 . H211 . 110.8    no
loop_
 _geom_hbond_atom_site_label_D
 _geom_hbond_site_symmetry_D
 _geom_hbond_atom_site_label_H
 _geom_hbond_site_symmetry_H
 _geom_hbond_atom_site_label_A
 _geom_hbond_site_symmetry_A
 _geom_hbond_angle_DHA
 _geom_hbond_distance_DH
 _geom_hbond_distance_HA
 _geom_hbond_distance_DA
 _geom_hbond_publ_flag
O6 . H61 . N4 3_657 161 0.83 1.93 2.722(4)    yes
N4 . H41 . O6 1_455 153 0.88 2.25 3.059(4)    yes
N4 . H42 . O6 2_445 158 0.90 2.11 2.968(4)    yes
